# Supplementary material for: Profiling of Circulating Free DNA Using Targeted and Genome-wide Sequencing in Patients with SCLC
Source: PubMed Central journal article supplement — J Thorac Oncol. 2020 Feb;15(2):216–30. doi: 10.1016/j.jtho.2019.10.007 (PMC7001105; doi:10.1016/j.jtho.2019.10.007), 2020-02

**PGA**

$p < 0.0001$ ,  $\rho$  (Spearman)=0.56, CI (95%)= [0.35, 0.72], n=55

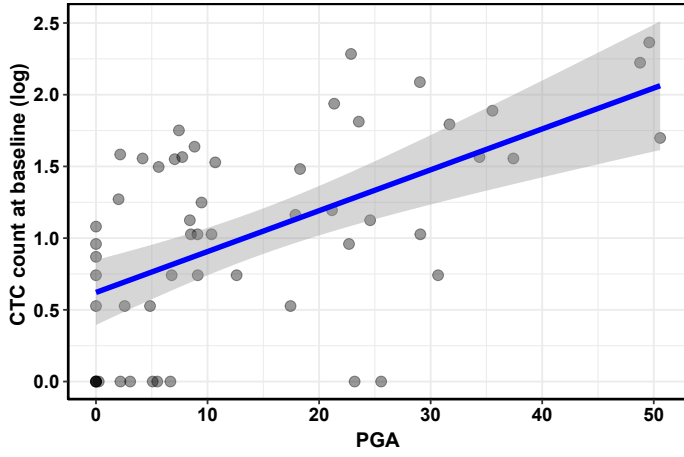

**Highest VAF all genes**

$p < 0.0001$ ,  $\rho$  (Spearman)=0.64, CI (95%)= [0.44, 0.78], n=48

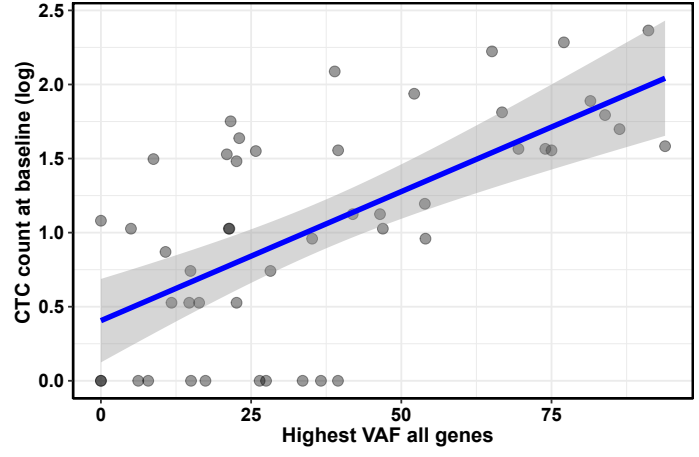

**Z-score**

$p < 0.0001$ ,  $\rho$  (Spearman)=0.56, CI (95%)= [0.35, 0.72], n=55

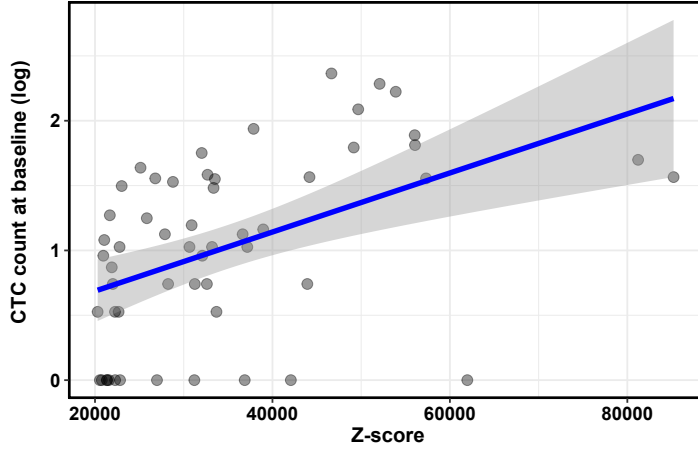

**Number of mutations**

$p = 0.228$ ,  $\rho$  (Spearman)=0.18, CI (95%)= [-0.11, 0.44], n=48

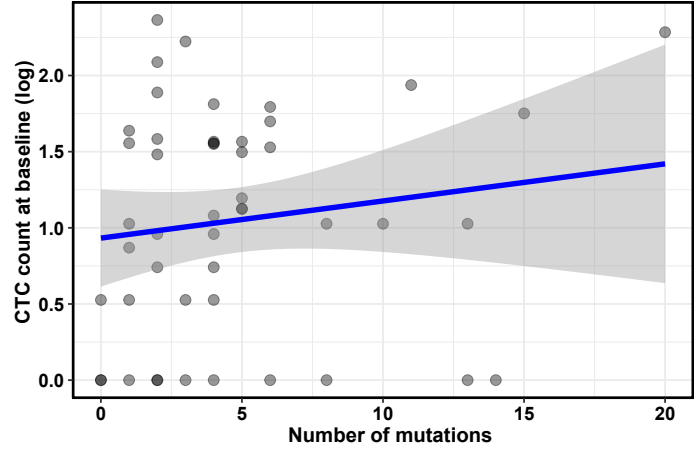

**Moran's I**

$p < 0.0001$ ,  $\rho$  (Spearman)=0.57, CI (95%)= [0.35, 0.72], n=55

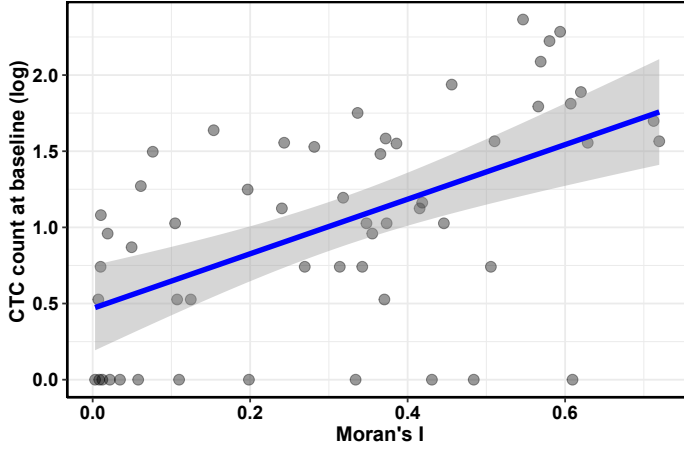

**Number of genes mutated**

$p = 0.089$ ,  $\rho$  (Spearman)=0.25, CI (95%)= [-0.04, 0.50], n=48

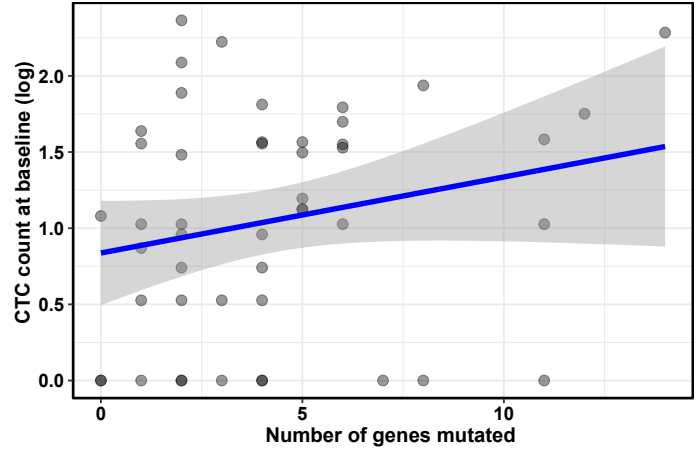

**TP53 VAF**

$p < 0.0001$ ,  $\rho$  (Spearman)=0.61, CI (95%)= [0.39, 0.76], n=48

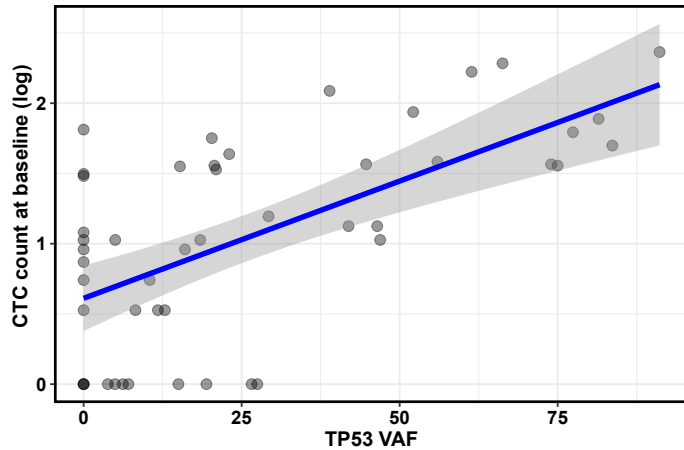

**RB1 VAF**

$p = 0.265$ ,  $\rho$  (Spearman)=0.16, CI (95%)= [-0.13, 0.43], n=48

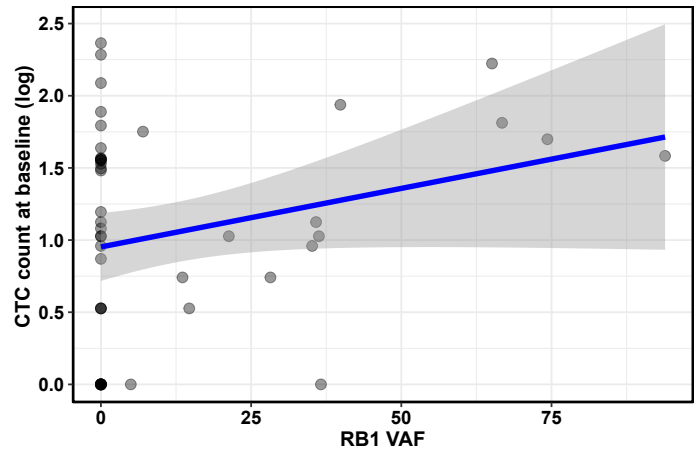

Supplement: mmc9.pdf [file mmc9.pdf]
