# Supplementary figures and images for: Profiling of Circulating Free DNA Using Targeted and Genome-wide Sequencing in Patients with SCLC
Source: PubMed Central journal article supplement — J Thorac Oncol. 2020 Feb;15(2):216–30. doi: 10.1016/j.jtho.2019.10.007 (PMC7001105; doi:10.1016/j.jtho.2019.10.007), 2020-02

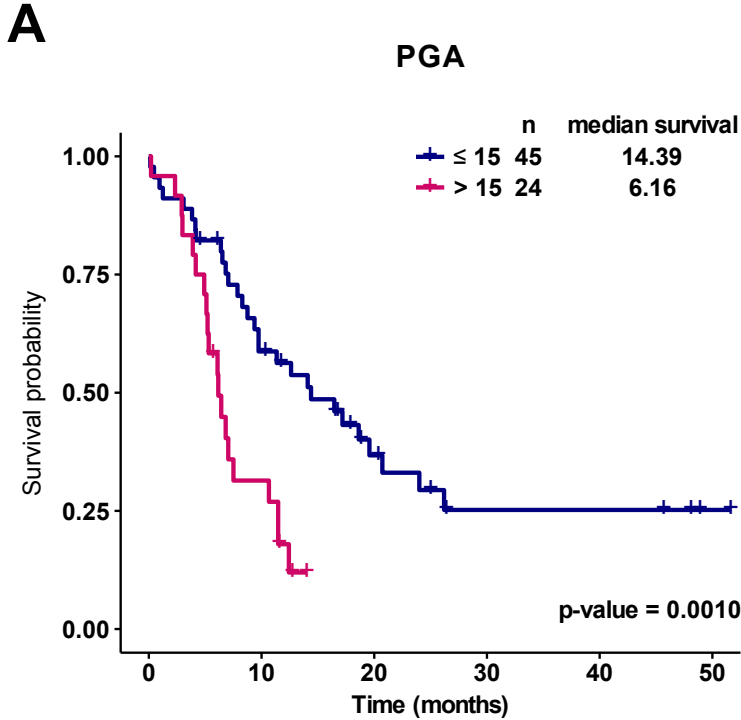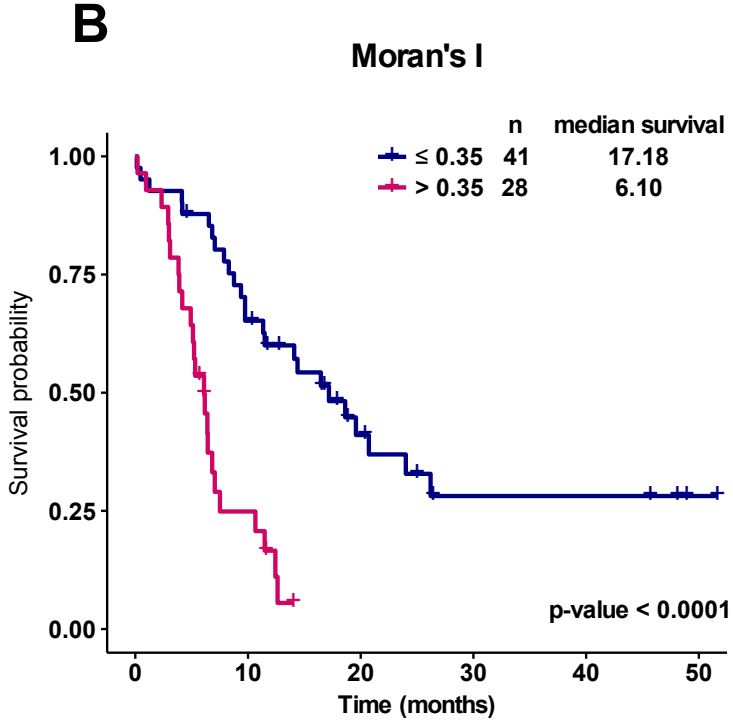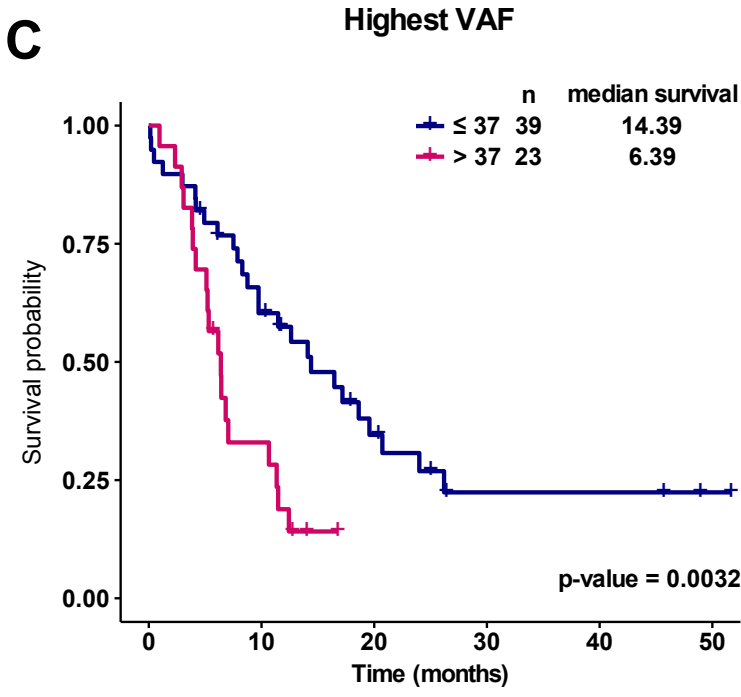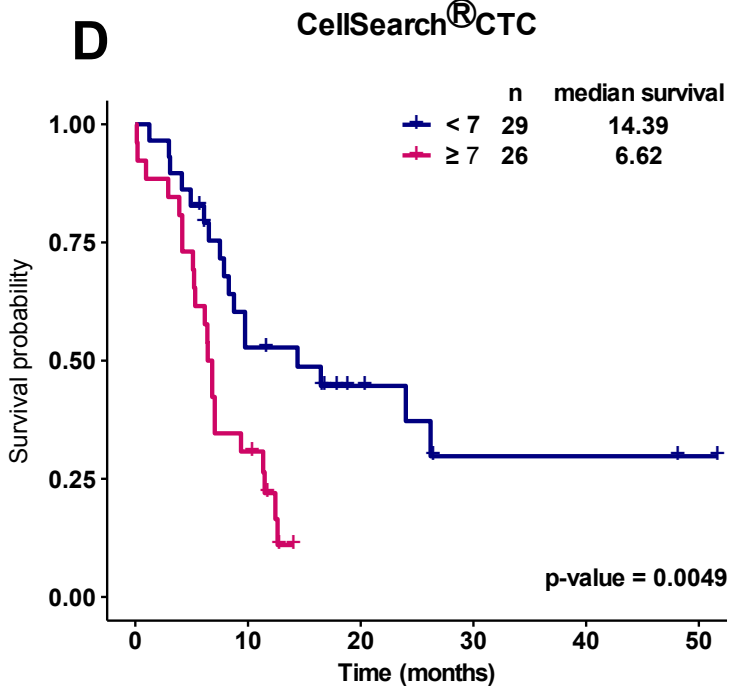

Supplement: mmc11.pdf [file mmc11.pdf]

# Mohan et al. Supplementary Figure 1

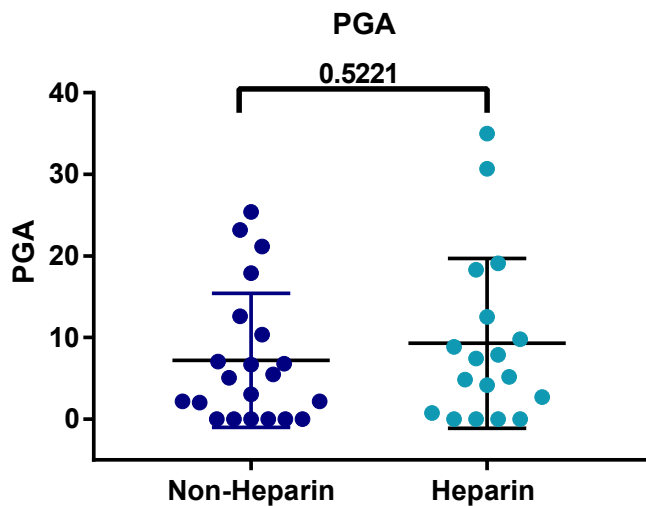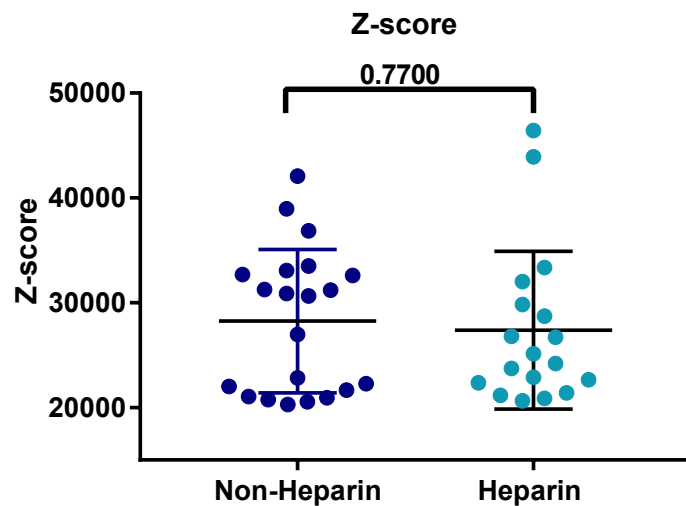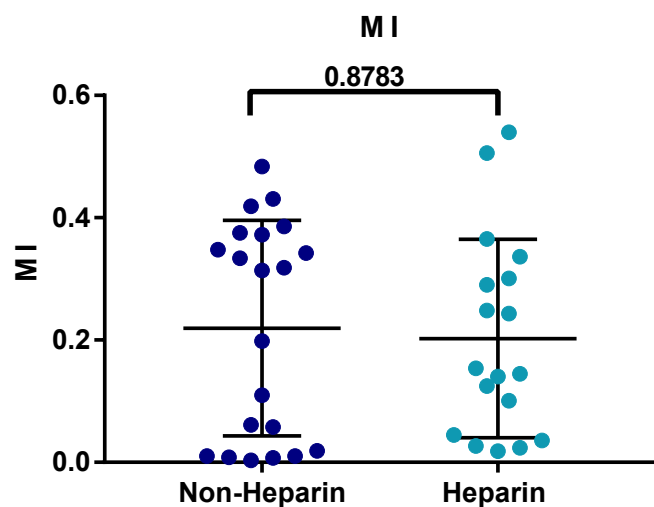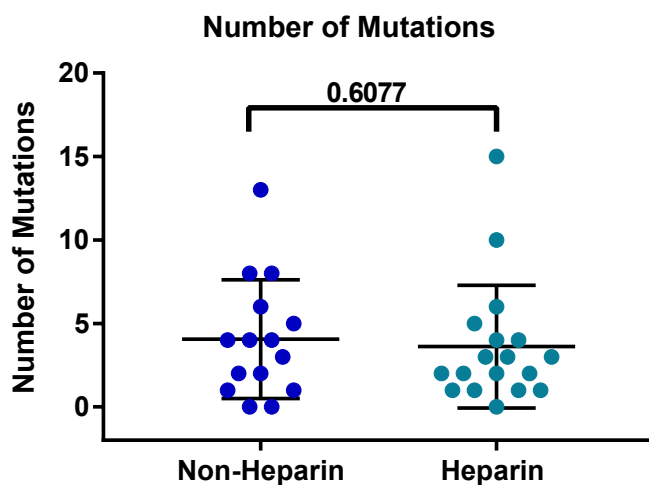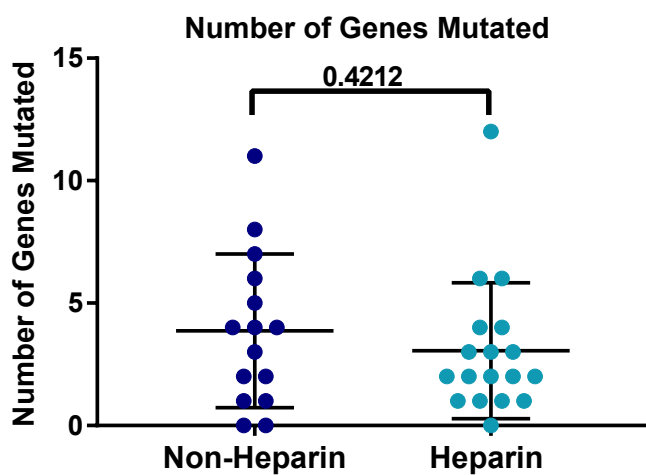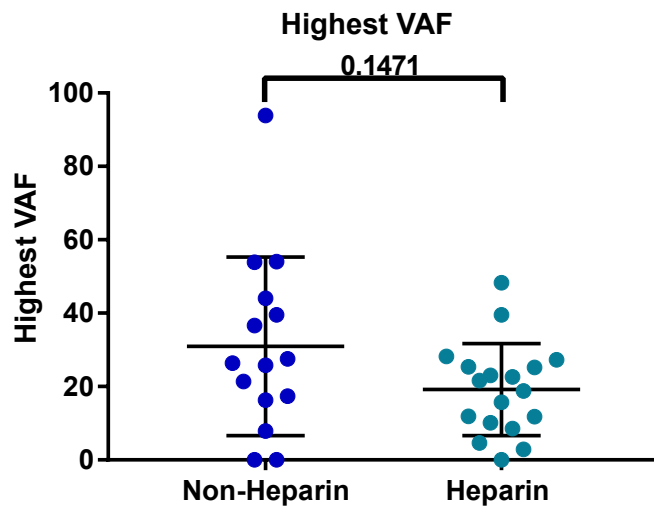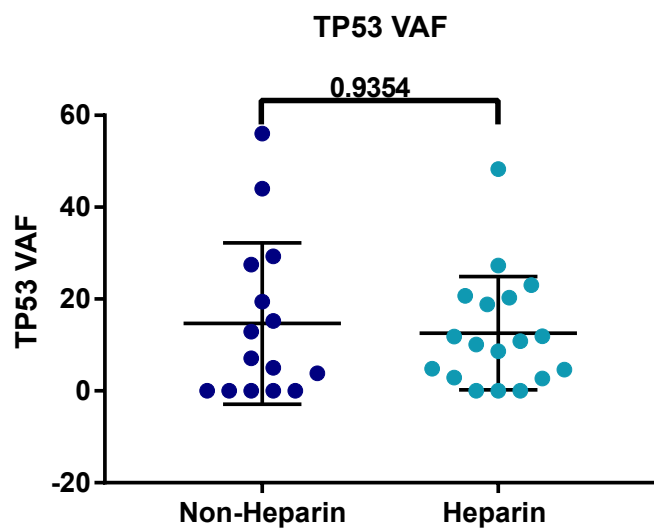

Supplement: mmc5.pdf [file mmc5.pdf]

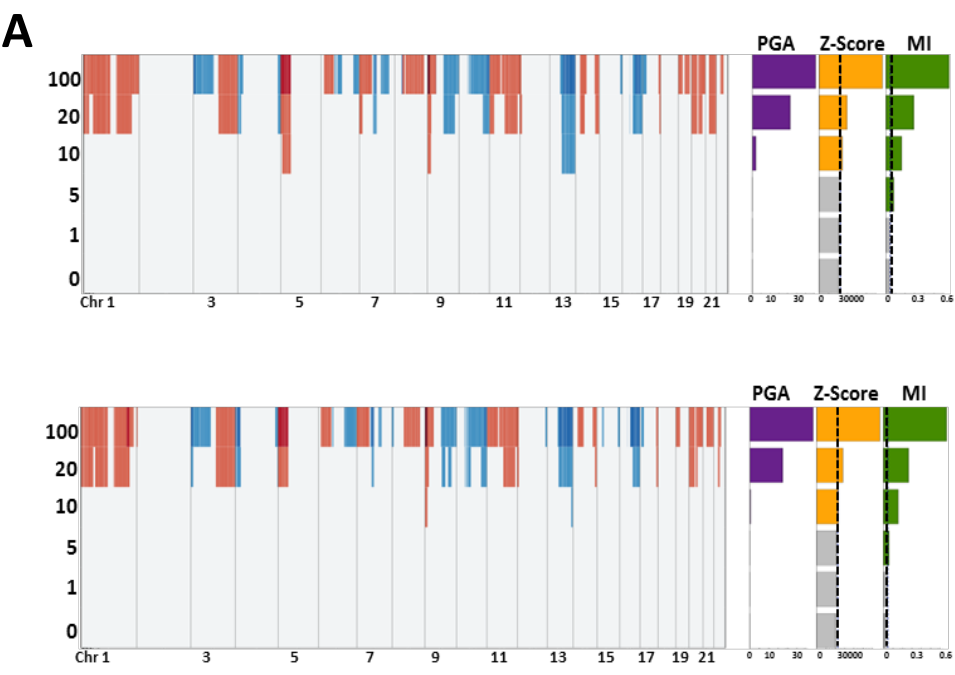

**B**

| DNA input into Whole genome Library (ng) | H446 Input (%) | PGA   | Z-Score  | MI     |
|------------------------------------------|----------------|-------|----------|--------|
| 20                                       | 100            | 35.81 | 67262.88 | 0.6601 |
|                                          | 20             | 21.42 | 29667.83 | 0.2923 |
|                                          | 10             | 1.98  | 24721.2  | 0.1653 |
|                                          | 5              | 0.00  | 22467.7  | 0.0825 |
|                                          | 1              | 0.00  | 21285.9  | 0.0358 |
|                                          | 0              | 0.00  | 20682.28 | 0.0341 |
| 5                                        | 100            | 33.82 | 67838.56 | 0.6650 |
|                                          | 20             | 17.57 | 28242.2  | 0.2653 |
|                                          | 10             | 0.37  | 23482.59 | 0.1560 |
|                                          | 5              | 0.00  | 21327.1  | 0.0604 |
|                                          | 1              | 0.00  | 21164.27 | 0.0377 |
|                                          | 0              | 0.00  | 20611.04 | 0.0247 |

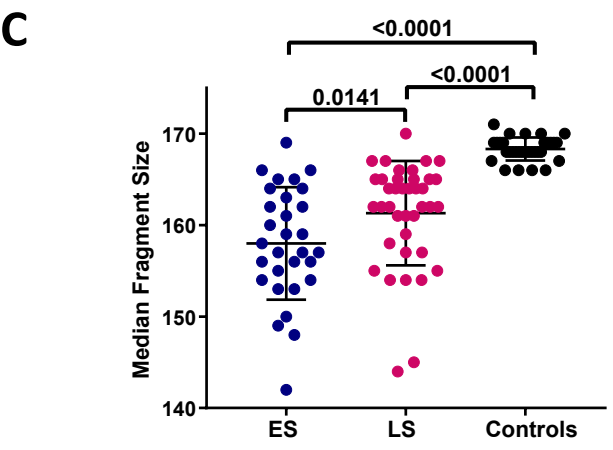

Supplement: mmc6.pdf [file mmc6.pdf]

**A**

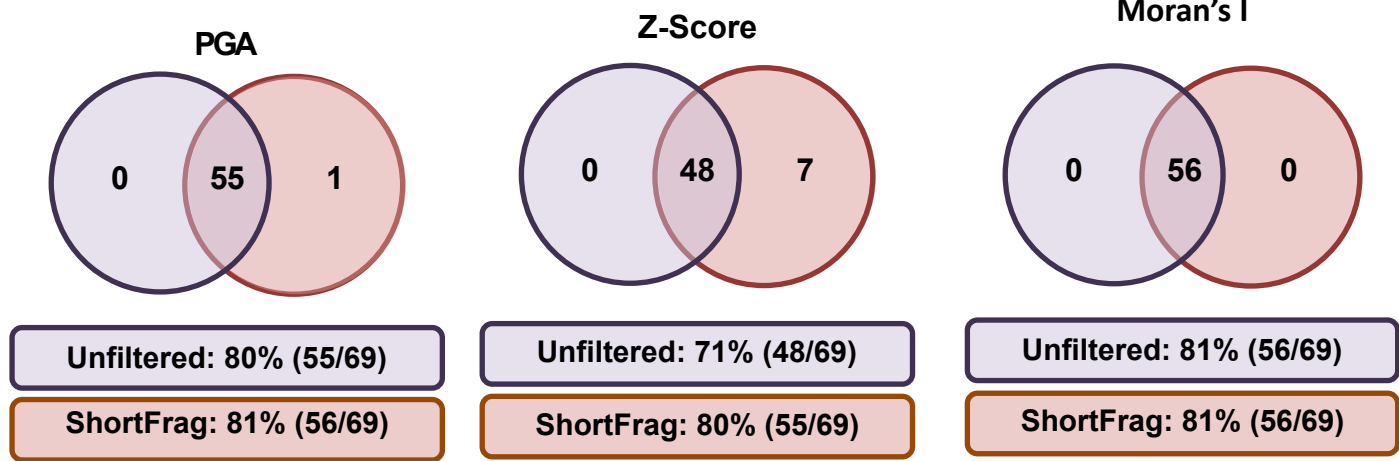

**B**

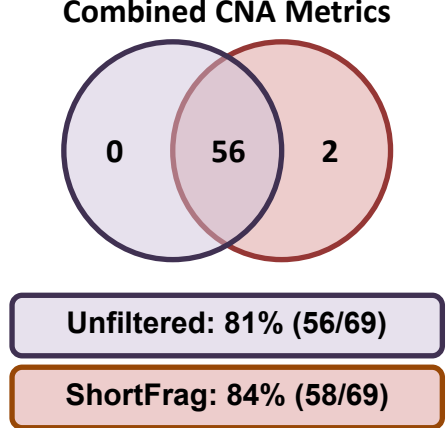

Supplement: mmc7.pdf [file mmc7.pdf]

**A**

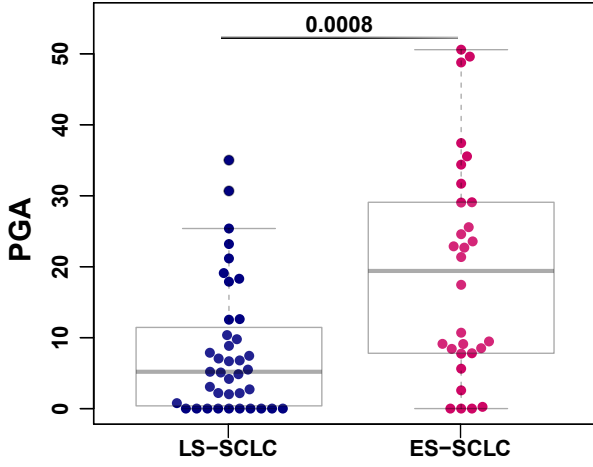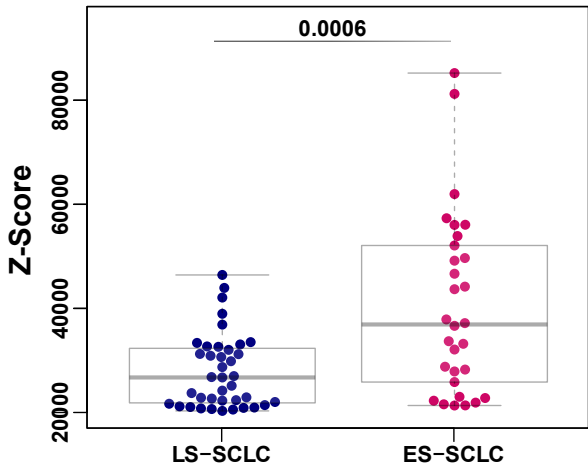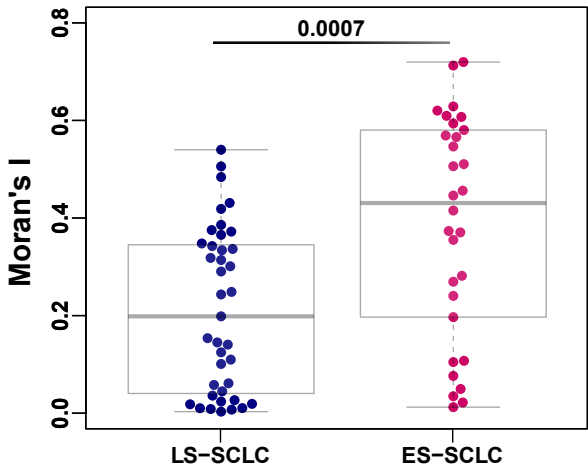

**B**

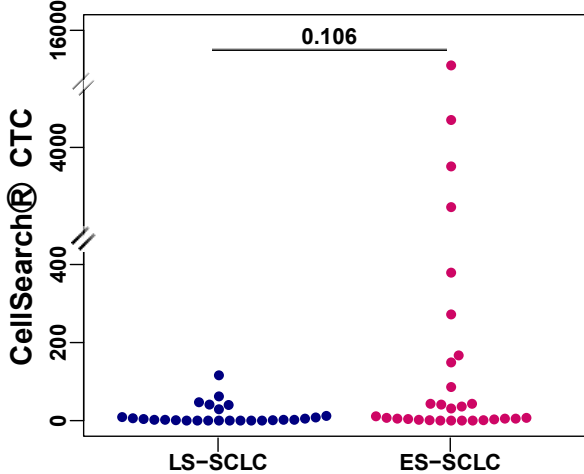

**C**

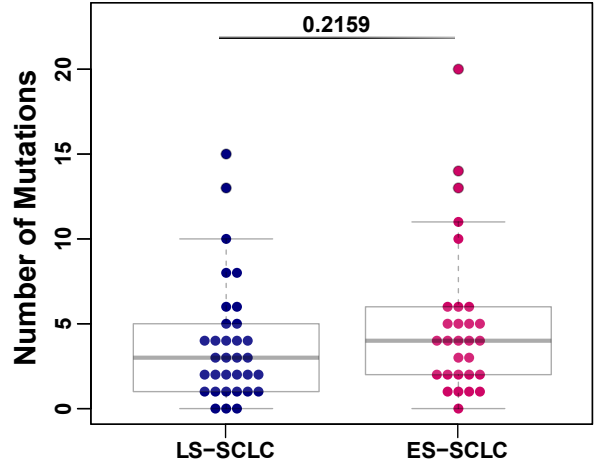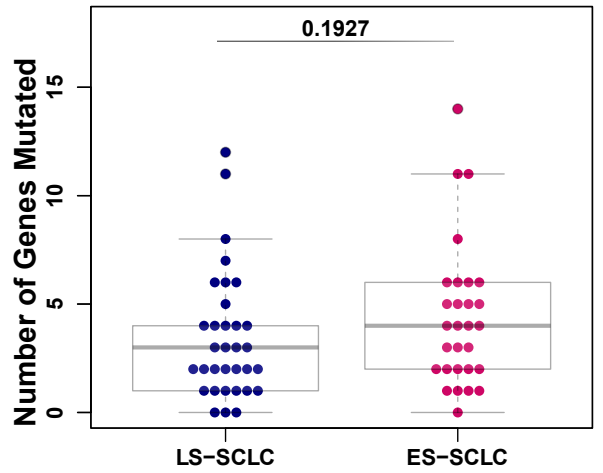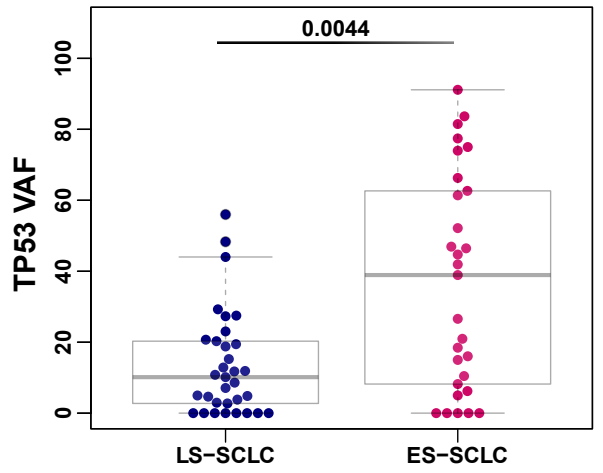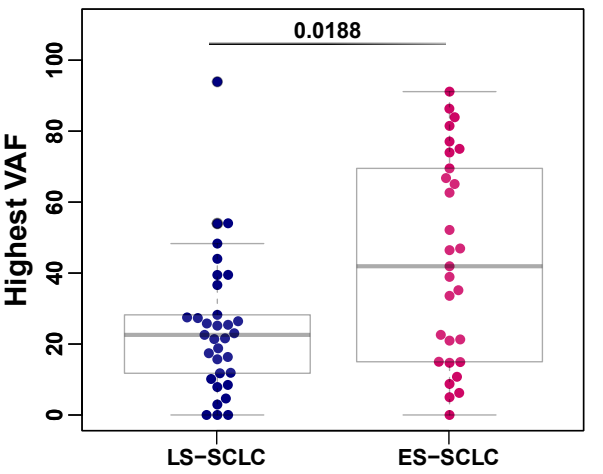

Supplement: mmc8.pdf [file mmc8.pdf]
